# Supplementary material for: Transcriptomic comparison of ovarian granulosa cells between adult sheep and prepubertal lambs
Source: PubMed Central journal article supplement (PMC8862527; doi:10.1186/s12864-022-08379-x), 2022-02-21
Supplement: 12864_2022_8379_MOESM5_ESM.pdf [file 12864_2022_8379_MOESM5_ESM.pdf]

Supplementary Table 5. Sequences for primers.

| Accession number | Genes                          | Sequence (5'-3')                                                   | Length (bp) |
|------------------|--------------------------------|--------------------------------------------------------------------|-------------|
| 443005           | <i>GAPDH</i>                   | Forward: TGATGACATCAAGAAGGTGGTG<br>Reverse: TCCTTGAGGCCATGTAGGCCAT | 240         |
| 443066           | <i>ESR2</i>                    | Forward: CCAGCCCTGTTTCTAGTC<br>Reverse: CGTCGGTTCTTATCTATGGT       | 173         |
| 101103044        | <i>ERBB4</i>                   | Forward: ATGGCGGCGTCTATGT<br>Reverse: CCCGAGCTACCATTGTGTA          | 104         |
| 443323           | <i>FST</i>                     | Forward: CCTGTCGGGATGTTTCTGT<br>Reverse: GTAGGCAGGTAGCTTTTCTC      | 160         |
| 100415775        | <i>ID3</i>                     | Forward: ATCTTCCCATCCAGACAGCCG<br>Reverse: AAGTCAAGTGGGCAGGGCAA    | 196         |
| 101106006        | <i>TGF<math>\beta</math>-1</i> | Forward: GAGCCCTGGACACCCAACTAC<br>Reverse: CCAGGACCTTGCTGTACTGTG   | 189         |
| 101111472        | <i>PLA2G4A</i>                 | Forward: CAGAGGAGATTAACGAAGA<br>Reverse: CCTCCATAAAGACTCAACA       | 101         |
| 101119185        | <i>TNFAIP6</i>                 | Forward: GATACTGTGGAGATGACCTT<br>Reverse: GAGTGGATTGGATAGAGGA      | 141         |
| 101121588        | <i>INHBE</i>                   | Forward: CTCCATCCGCTGTC<br>Reverse: TGCCATCACGGTCAAGGTAG           | 99          |
| 101109620        | <i>FBN1</i>                    | Forward: AACACGCAGGGCTCTTACAC<br>Reverse: ATCAATGTCTCGGCACTCT      | 81          |
| 101103646        | <i>AFP</i>                     | Forward: CCCTGGCAAAACGAAGC<br>Reverse: ACTGAGATGGCAACAAACGG        | 167         |
| 101105743        | <i>LAMB1</i>                   | Forward: TTAGCCCTGTGCGGAGTT<br>Reverse: TACAGTAAGGCTCGGGTTTG       | 163         |
| 497271           | <i>ANGPT1</i>                  | Forward: AAGGAGCGAGTTTTGCGAGA<br>Reverse: TGCTGCACCCTATGTGAGTC     | 108         |
| 497273           | <i>ANGPT2</i>                  | Forward: AACCCCTCATACTCGCTTGC                                      | 179         |

|           |                     |                                                                                           |     |
|-----------|---------------------|-------------------------------------------------------------------------------------------|-----|
|           |                     | Reverse: CGCTGAATAACCGTCCACC                                                              |     |
| 101102010 | <i>SCUBE2</i>       | Forward: GTGGACGAGTGCCTGGAGAA<br>Reverse: GCCTCCTTGCAGATGTGACT                            | 188 |
| 443460    | <i>PTGS2</i>        | Forward: TTGATTGAGAGTCCGCCAAC<br>Reverse: TTTCTCCCTTTCACACCCA                             | 141 |
| 100137067 | <i>FABP4</i>        | Forward: AGAAGTGGGTGTGGGCTTTG<br>Reverse: CTGGCCCAATTTGAAGGACA                            | 142 |
| 443031    | <i>CASPASE3</i>     | Forward: CCGAAAGGTAGCGACAG<br>Reverse: GTTTGGTCACTTGGCATAACA                              | 163 |
| 443059    | <i>BAX</i>          | Forward: TCTACTTTGCCAGCAAAGTGGTGC<br>Reverse: AAGGAAGTCCAATGTCCAGCCCAT                    | 109 |
| 101119602 | <i>BCL2</i>         | Forward: TTCGCCGAGATGTCCAGTCA<br>Reverse: TCCGAACTCAAAGAAGGCCACGAT                        | 125 |
| 100307035 | <i>CAT</i>          | Forward: CTTCAACAGTGCCAGCGAT<br>Reverse: GTTCTCACACAGGCGTTTC                              | 94  |
| 100820742 | <i>GPXI</i>         | Forward: TGCGAGGTGAATGGCGAGAA<br>Reverse: GAGACGTCGTTGCCGCACAC                            | 140 |
| 100270717 | <i>SOD1</i>         | Forward: AAGGGAGATAAAGTCGTCGTA<br>Reverse: TTCACATTGCCAGGTCTC                             | 191 |
| 780457    | <i>SOD2</i>         | Forward: CCGTCAGCCTTACACCAAGT<br>Reverse: CAAGCCACGCTCAGAAACAC                            | 112 |
| 101123434 | <i>FOXO6</i>        | Forward: CGACCTCATCACCAAAGCCA<br>Reverse: ACGGACCATCCAGTCGTAG                             | 79  |
| 101111664 | <i>GSTT2B</i>       | Forward: GCCCGCAAGTATAAGGTCCC<br>Reverse: TCACCCAGGAAAACAGGAA                             | 155 |
| 101111664 | <i>GSTT2B</i> (CDS) | Forward: GAATTCATGGGCTGGAGCTCTACCTGGACCTGCTGT<br>Reverse: GGATCCTTACTGGATCATGGCCAGCACTTTG | 723 |
| 100137067 | <i>FABP4</i> (CDS)  | Forward: GAATTCATGTGTGATGCATTTGTAGG<br>Reverse: GGATCCTTATGCTCTCTCGTAAACT                 | 399 |

|           |                      |                                                                                       |      |
|-----------|----------------------|---------------------------------------------------------------------------------------|------|
| 101111472 | <i>PLA2GA4</i> (CDS) | Forward: GAATTCATGTCATTTATAGATCCTTATC<br>Reverse: GGATCCTTATGCTGTGGGTTTGCT            | 2262 |
| 101123434 | <i>FOXO6</i> (CDS)   | Forward: GAATTCATGGCTGCGAAGCTGCGAGCGCATCA<br>Reverse: GGATCCTCAGCCTGGCACCCAGCTCTGGTTG | 1710 |

---
