# Supplementary material for: Transcriptomic comparison of ovarian granulosa cells between adult sheep and prepubertal lambs
Source: BMC Genomics. 2022 Feb 21;23:151. doi: 10.1186/s12864-022-08379-x (PMC8862527; doi:10.1186/s12864-022-08379-x)
Supplement: Supplementary file 3 — Additional file 3: Table S3. Go and pathway enrichment of DEGs. [file 12864_2022_8379_MOESM3_ESM.xlsx]

## Sheet: A vs.B & A vs.C enrichment_GO
A vs.B & A vs.C enrichment GO terms
CC
GO:0005578//proteinaceous extracellular matrix
GO:0005615//extracellular space
GO:0005887//integral component of plasma membrane;
GO:0009986//cell surface
GO:0070062//extracellular vesicular exosome
BP
GO:0071560//cellular response to transforming growth factor beta stimulus;
GO:0007155//cell adhesion;
GO:0007411//axon guidance;
GO:0030198//extracellular matrix organization;
GO:0042060//wound healing
GO:0042127//regulation of cell proliferation;
GO:0042476//odontogenesis;
GO:0045165//cell fate commitment;
GO:0050900//leukocyte migration;
MF
GO:0008307//structural constituent of muscle
GO:0042803//protein homodimerization activity;

## Sheet: A-vs-B&A vs.C.Pathenrich_top
A vs.B & A vs.C enrichment Pathway
Toxoplasmosis
Thyroid hormone signaling pathway
Small cell lung cancer
Signaling pathways regulating pluripotency of stem cells
Shigellosis
Serotonergic synapse
Regulation of lipolysis in adipocytes
Regulation of actin cytoskeleton
Ras signaling pathway
Rap1 signaling pathway
Proteoglycans in cancer
Prostate cancer
Platelet activation
PI3K-Akt signaling pathway
Phagosome
Pertussis
Pathways in cancer
Pathogenic Escherichia coli infection
Osteoclast differentiation
Nicotine addiction
MicroRNAs in cancer
Malaria
Leukocyte transendothelial migration
Leishmaniasis
Hypertrophic cardiomyopathy (HCM)
HTLV-I infection
Hematopoietic cell lineage
Focal adhesion
ECM-receptor interaction
Drug metabolism - cytochrome P450
Dilated cardiomyopathy
Chemical carcinogenesis
Cell adhesion molecules (CAMs)
Bacterial invasion of epithelial cells
Axon guidance
Arrhythmogenic right ventricular cardiomyopathy (ARVC)
Amoebiasis
Adherens junction
